# Supplementary material
Source: publisher figshare collection journal article supplement (https://aacr.figshare.com/articles/dataset/_/22472774)
Supplement: Supplementary file 1 [file 39924278]

**Supplementary Table S4.** Descriptive statistics of ASTX660 pharmacokinetic parameters per dose level across cycles and days: pharmacokinetic population

| Study Day | Cohort # (n) | Dose, mg/d       | Formulation | Mean AUC <sub>0-24</sub> , h*ng/mL (SD) | Mean C <sub>max</sub> , ng/mL (SD) | Mean C <sub>min</sub> , ng/mL (SD) | Median T <sub>max</sub> , h (range) | Mean t <sub>1/2</sub> , h (SD) | Mean RAUC (SD) | Mean RCMAX (SD) |
|-----------|--------------|------------------|-------------|-----------------------------------------|------------------------------------|------------------------------------|-------------------------------------|--------------------------------|----------------|-----------------|
| C2D1      | 1 (3)        | 15               | PiB         | 54.8<br>(23.3)                          | 9.22<br>(3.20)                     | —                                  | 0.52<br>(0.48–4.00)                 | 9.83<br>(6.81)                 | —              | —               |
|           | 2 (3)        | 30               | PiB         | 71.6<br>(33.2)                          | 15.1<br>(8.86)                     | —                                  | 0.50<br>(0.48–3.03)                 | 18.80<br>(13.50)               | —              | —               |
|           | 3 (3)        | 60               | PiB         | 242<br>(86)                             | 70.3<br>(17.5)                     | —                                  | 0.50<br>(0.50–0.57)                 | 11.90<br>(1.83)                | —              | —               |
|           | 4 (3)        | 120              | PiB         | 1180<br>(691)                           | 268<br>(129)                       | —                                  | 2.92<br>(0.45–3.02)                 | 13.00<br>(2.67)                | —              | —               |
|           | 5 (3)        | 180              | PiB         | 1300<br>(1430)                          | 496<br>(584)                       | —                                  | 0.50<br>(0.40–0.52)                 | 12.20<br>(1.20)                | —              | —               |
|           | 6 (4)        | 180              | Cap         | 1270<br>(530)                           | 373<br>(289)                       | —                                  | 0.75<br>(0.50–2.00)                 | 9.75<br>(1.59)                 | —              | —               |
|           | 6-EXP (5)    | 180              | Cap         | 1670<br>(1050)                          | 419<br>(308)                       | —                                  | 2.97<br>(0.50–5.02)                 | 9.97<br>(2.27)                 | —              | —               |
|           | 7 (2)        | 270              | Cap         | 4240<br>(141)                           | 1020<br>(367)                      | —                                  | 1.28<br>(0.55–2.00)                 | 9.41<br>(9.20)                 | —              | —               |
|           | 7 (2)        | 180 <sup>a</sup> | Cap         | 1860<br>(361)                           | 604<br>(337)                       | —                                  | 0.77<br>(0.53–1.00)                 | 9.60<br>(2.37)                 | —              | —               |
|           | 8 (5)        | 210              | Cap         | 3100<br>(1490)                          | 626<br>(388)                       | —                                  | 2.92<br>(0.50–2.95)                 | 10.30<br>(1.44)                | —              | —               |
|           | 8 (2)        | 180 <sup>a</sup> | Cap         | 1650<br>(64)                            | 271<br>(22)                        | —                                  | 2.50<br>(2.00–3.00)                 | 8.64<br>(1.53)                 | —              | —               |
| C2D7      | 1 (3)        | 15               | PiB         | 130<br>(99)                             | 14.1<br>(11.9)                     | 2.65<br>(1.49)                     | 0.53<br>(0.42–4.03)                 | 31.80<br>(7.01)                | 2.39<br>(1.20) | 1.44<br>(0.80)  |
|           | 2 (3)        | 30               | PiB         | 151<br>(70)                             | 16.2<br>(5.23)                     | 4.88<br>(2.89)                     | 0.50<br>(0.50–2.00)                 | 75.60<br>(67.80)               | 2.32<br>(1.19) | 1.59<br>(1.48)  |

|              |                  |     |                |                |                |                     |                 |                |                |
|--------------|------------------|-----|----------------|----------------|----------------|---------------------|-----------------|----------------|----------------|
| 3 (2)        | 60               | PiB | 254<br>(217)   | 37.5<br>(16.5) | 3.45<br>(2.86) | 2.52<br>(1.03–4.00) | 21.10<br>(7.03) | 0.10<br>(0.44) | 0.46<br>(0.14) |
| 4 (3)        | 120              | PiB | 1700<br>(958)  | 234<br>(174)   | 33.3<br>(23.4) | 0.50<br>(0.50–4.08) | 29.40<br>(6.30) | 1.48<br>(0.12) | 0.81<br>(0.21) |
| 5 (1)        | 180              | PiB | 962<br>(—)     | 93.2<br>(—)    | 15.1<br>(—)    | 4.00<br>(4.00–4.00) | 17.20<br>(—)    | 3.10<br>(—)    | 1.02<br>(—)    |
| 6 (4)        | 180              | Cap | 1960<br>(694)  | 440<br>(429)   | 32.2<br>(16.7) | 2.46<br>(0.52–6.17) | 19.50<br>(2.38) | 1.60<br>(0.23) | 1.17<br>(0.59) |
| 6-EXP<br>(5) | 180              | Cap | 2910<br>(1920) | 468<br>(325)   | 49.5<br>(41.8) | 3.00<br>(0.92–4.70) | 19.30<br>(5.54) | 1.82<br>(0.40) | 1.42<br>(0.66) |
| 7 (1)        | 270              | Cap | 16,900<br>(—)  | 2240<br>(—)    | 385<br>(—)     | 2.08<br>(2.08–2.08) | 13.70<br>(—)    | 4.09<br>(—)    | 2.92<br>(—)    |
| 7 (2)        | 180 <sup>a</sup> | Cap | 3380<br>(1540) | 529<br>(2.93)  | 54.1<br>(28.1) | 2.47<br>(1.92–3.02) | 17.50<br>(8.34) | 1.77<br>(0.49) | 1.04<br>(0.57) |
| 8 (4)        | 210              | Cap | 4540<br>(3760) | 852<br>(835)   | 92.0<br>(69.6) | 0.74<br>(0.50–2.00) | 23.50<br>(5.28) | 1.62<br>(0.87) | 1.37<br>(0.78) |
| 8 (2)        | 180 <sup>a</sup> | Cap | 2820<br>(457)  | 455<br>(320)   | 49.9<br>(13.7) | 1.71<br>(0.42–3.00) | 16.40<br>(8.56) | 1.70<br>(0.21) | 1.64<br>(1.05) |

<sup>a</sup>Dose reduced.

—, not calculated; 6-EXP, phase 1 part 2 dose-expansion with 180-mg capsules (Cap); C2D1, cycle 2, day 1; C2D7, cycle 2, day 7; C<sub>min</sub>, minimal concentration; D, day; R<sub>AUC</sub>, accumulation ratio for AUC at steady state vs 1st dose interval; R<sub>C<sub>max</sub></sub>, accumulation ratio for C<sub>max</sub> at steady state vs 1<sup>st</sup> dose interval; t<sub>1/2</sub>, elimination half-life; T<sub>max</sub>, time to C<sub>max</sub>.
